# Supplementary material for: A trans-Pt(ii) hedgehog pathway inhibitor complex with cytotoxicity towards breast cancer stem cells and triple negative breast cancer cells
Source: Royal Society of Chemistry journal article supplement (doi:10.1039/d2dt02865d), 2022-01-01
Supplement: d2dt02865d1.pdf [file d2dt02865d1.pdf]

## **A *trans*-Pt(II) hedgehog pathway inhibitor complex with cytotoxicity towards breast cancer stem cells and triple negative breast cancer cells.**

Aisling L. Ryan,<sup>a,b</sup> Joshua Northcote-Smith,<sup>c</sup> Aoife McKeon,<sup>a</sup> Andrew Roe,<sup>d</sup> Paul O'Dowd,<sup>a,b</sup> Brendan Twamley,<sup>e</sup> Triona Ní Chonghaile,<sup>d</sup> Kogularamanan Suntharalingam<sup>c\*</sup> and Darren M. Griffith<sup>a,b\*</sup>

<sup>a</sup> *Department of Chemistry, RCSI, 123 St. Stephens Green, Dublin 2, Ireland.*

<sup>b</sup> *SSPC, Synthesis and Solid State Pharmaceutical Centre, Ireland*

<sup>c</sup> *School of Chemistry, University of Leicester, Leicester LE1 7RH (UK).*

<sup>d</sup> *Department of Physiology and Medical Physics, Royal College of Surgeons in Ireland, Dublin, Ireland*

<sup>e</sup> *School of Chemistry, Trinity College Dublin, University of Dublin, Dublin 2, Ireland*

### **Supplementary Information**

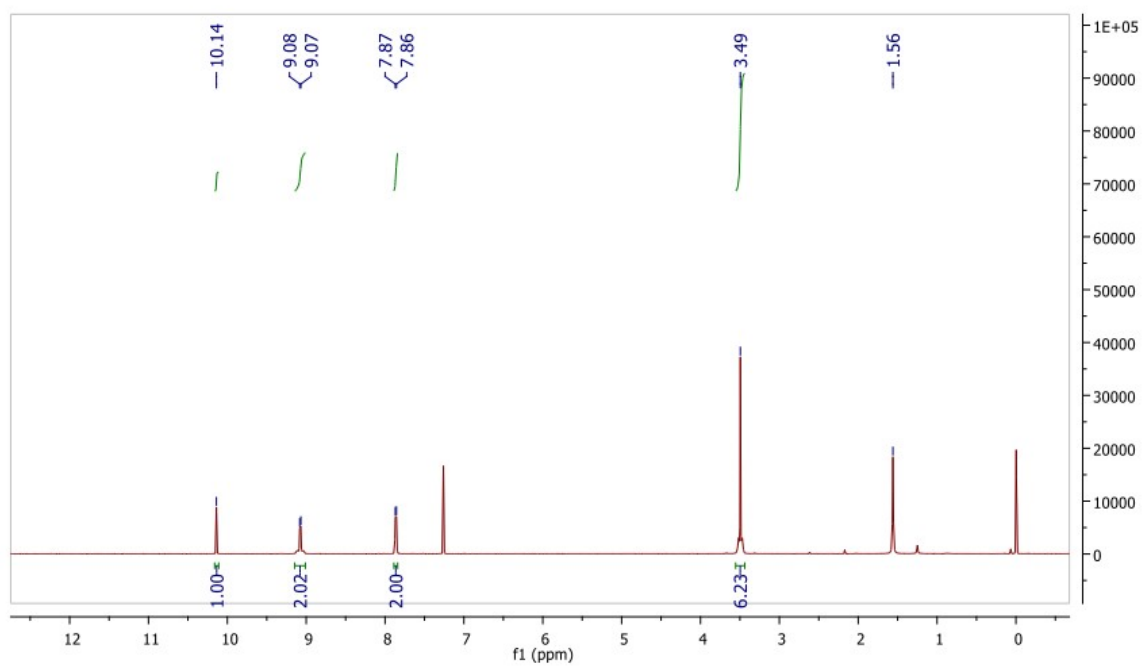

Figure S1. <sup>1</sup>H NMR spectrum of **1** in CDCl<sub>3</sub>.

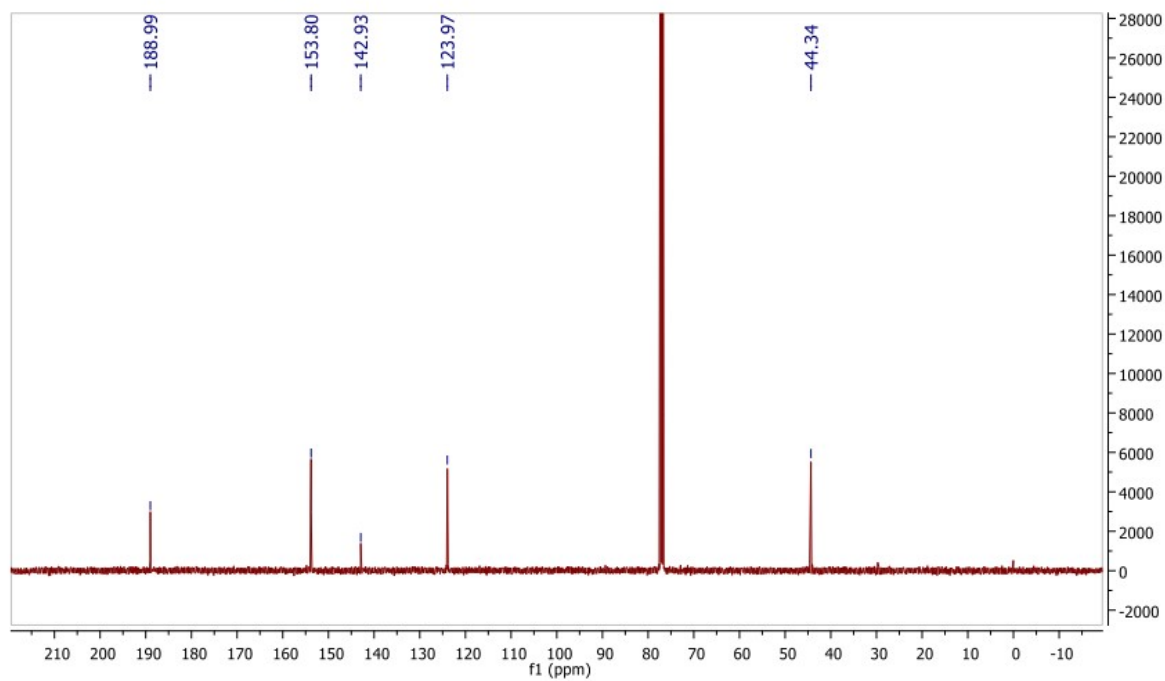

Figure S2. <sup>13</sup>C NMR spectrum of **1** in CDCl<sub>3</sub>.

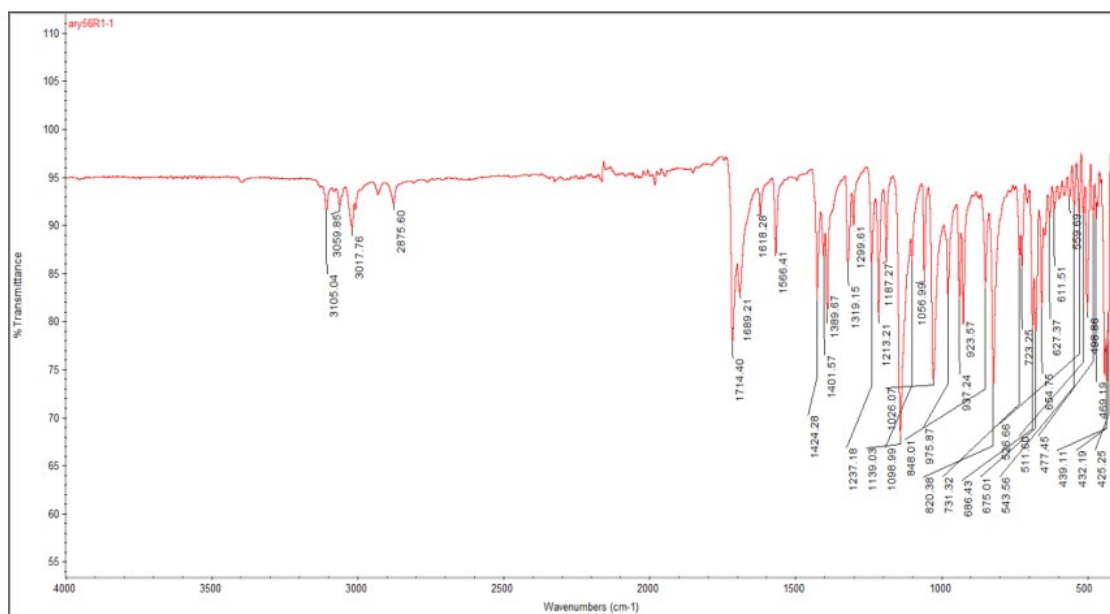

Figure S3. IR spectrum of **1**.

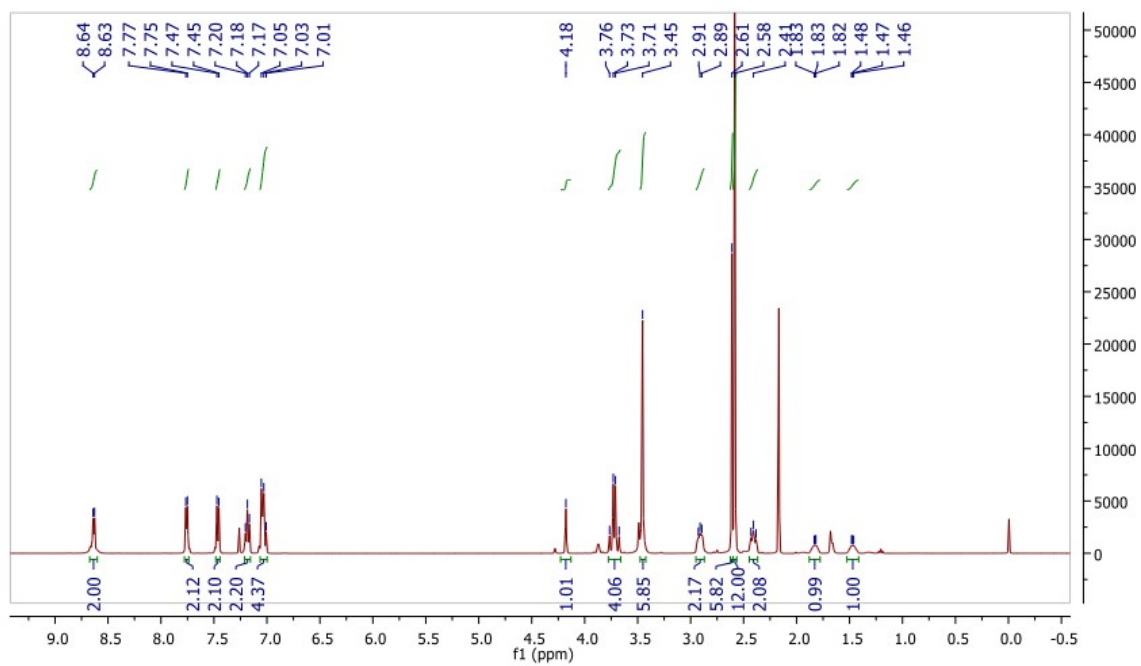

Figure S4. <sup>1</sup>H NMR spectrum of **2** in CDCl<sub>3</sub>.

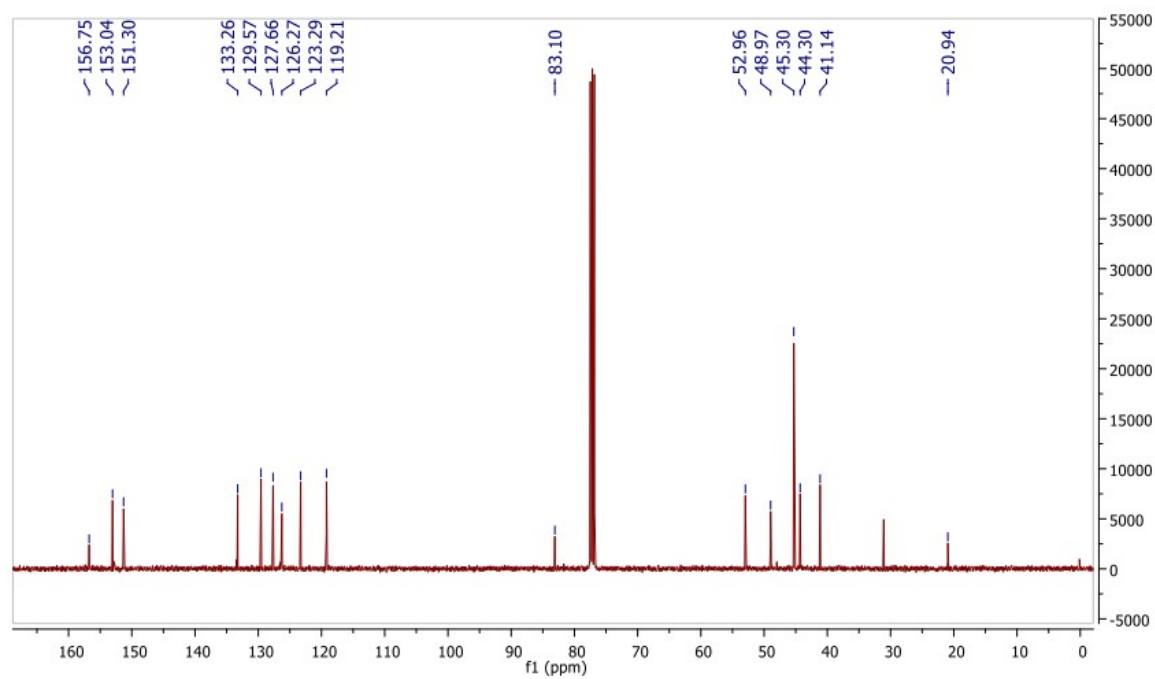

Figure S5.  $^{13}\text{C}$  NMR spectrum of **2** in  $\text{CDCl}_3$ .

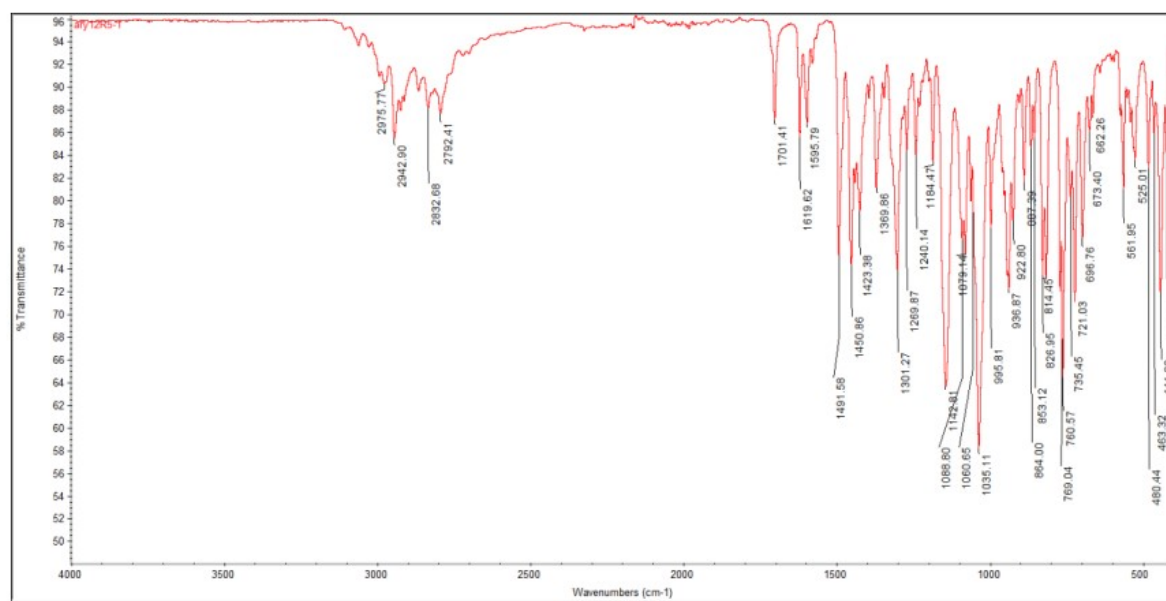

Figure S6. IR spectrum of **2**.

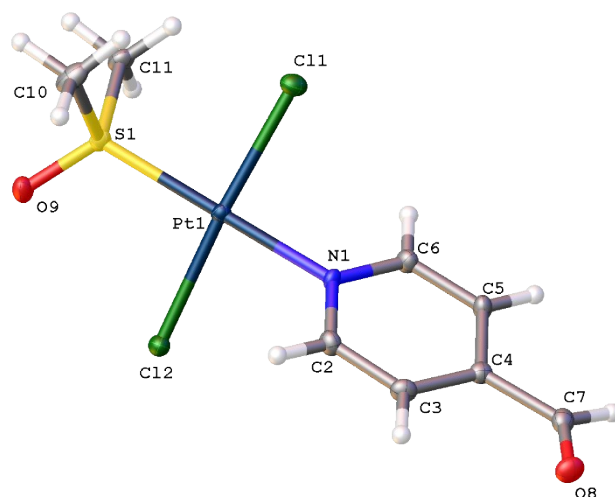

Figure S7. Fully labelled molecular structure of **1** with atomic displacement at 50% probability.

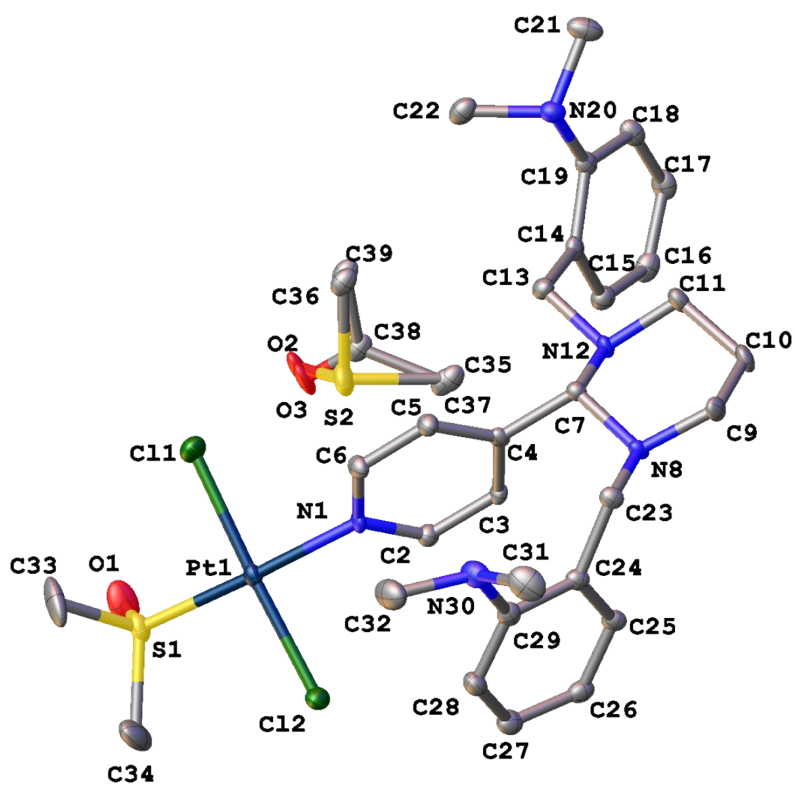

Figure S8. Fully labelled molecular structure of **2** with atomic displacement at 50% probability. Partially occupied mixed solvent DMSO/acetone shown also.

Table S1 Crystal data and structure refinement for **1** and **2**.

|                                                               |                                                                                 |                                                                                                          |
|---------------------------------------------------------------|---------------------------------------------------------------------------------|----------------------------------------------------------------------------------------------------------|
| Identification Code                                           | 1                                                                               | 2                                                                                                        |
| Empirical formula                                             | C <sub>8</sub> H <sub>11</sub> Cl <sub>2</sub> NO <sub>2</sub> PtS              | C <sub>30.65</sub> H <sub>45.5</sub> Cl <sub>2</sub> N <sub>5</sub> O <sub>1.75</sub> PtS <sub>1.6</sub> |
| <i>M</i> (g/mol)                                              | 451.23                                                                          | 829.30                                                                                                   |
| <i>T</i> (K)                                                  | 100(2)                                                                          | 100(2)                                                                                                   |
| Crystal System                                                | orthorhombic                                                                    | triclinic                                                                                                |
| SG                                                            | P2 <sub>1</sub> 2 <sub>1</sub> 2 <sub>1</sub>                                   | p1                                                                                                       |
| <i>a</i> (Å)                                                  | 7.8958(4)                                                                       | 8.787(3)                                                                                                 |
| <i>b</i> (Å)                                                  | 8.1157(4)                                                                       | 9.901(2)                                                                                                 |
| <i>c</i> (Å)                                                  | 19.7202(9)                                                                      | 20.617(6)                                                                                                |
| $\alpha$ (°)                                                  | 90                                                                              | 98.136(10)                                                                                               |
| $\beta$ (°)                                                   | 90                                                                              | 97.555(7)                                                                                                |
| $\gamma$ (°)                                                  | 90                                                                              | 94.640(8)                                                                                                |
| <i>V</i> (Å <sup>3</sup> )                                    | 1263.67(11)                                                                     | 1751.2(8)                                                                                                |
| <i>Z</i>                                                      | 4                                                                               | 2                                                                                                        |
| <i>D</i> <sub>calc</sub> (g/cm <sup>3</sup> )                 | 2.372                                                                           | 1.573                                                                                                    |
| $\mu$ (mm <sup>-1</sup> )                                     | 11.671                                                                          | 4.288                                                                                                    |
| <i>F</i> (000)                                                | 840.0                                                                           | 832.0                                                                                                    |
| Crystal size (mm <sup>3</sup> )                               | 0.08 × 0.07 × 0.05                                                              | 0.17 × 0.14 × 0.1                                                                                        |
| Radiation                                                     | Mo K $\alpha$ ( $\lambda$ = 0.71073)                                            | Mo K $\alpha$ ( $\lambda$ = 0.71073)                                                                     |
| Reflections collected                                         | 68332                                                                           | 40236                                                                                                    |
| Independent reflections                                       | 4231<br><i>R</i> <sub>int</sub> = 0.0487,<br><i>R</i> <sub>sigma</sub> = 0.0249 | 8428<br><i>R</i> <sub>int</sub> = 0.0486,<br><i>R</i> <sub>sigma</sub> = 0.0362                          |
| Data/restraints/parameters                                    | 4231/0/138                                                                      | 8428/0/392                                                                                               |
| Goodness-of-fit on <i>F</i> <sup>2</sup> ( <i>S</i> )         | 1.092                                                                           | 1.050                                                                                                    |
| Final <i>R</i> indexes [ <i>I</i> ≥ 2 $\sigma$ ( <i>I</i> )]* | <i>R</i> <sub>1</sub> = 0.0163,<br><i>wR</i> <sub>2</sub> = 0.0269              | <i>R</i> <sub>1</sub> = 0.0299,<br><i>wR</i> <sub>2</sub> = 0.0658                                       |
| Final <i>R</i> indexes [all data]                             | <i>R</i> <sub>1</sub> = 0.0192,<br><i>wR</i> <sub>2</sub> = 0.0275              | <i>R</i> <sub>1</sub> = 0.0390,<br><i>wR</i> <sub>2</sub> = 0.0692                                       |
| Largest diff. peak/hole / e Å <sup>-3</sup>                   | 1.20/-1.43                                                                      | 1.64/-1.15                                                                                               |
| CCDC No.                                                      | 2196198                                                                         | 2196199                                                                                                  |

$$*R_1 = \frac{\sum ||F_o| - |F_c||}{\sum |F_o|}, wR_2 = \left[ \frac{\sum w(F_o^2 - F_c^2)^2}{\sum w(F_o^2)^2} \right]^{1/2}.$$

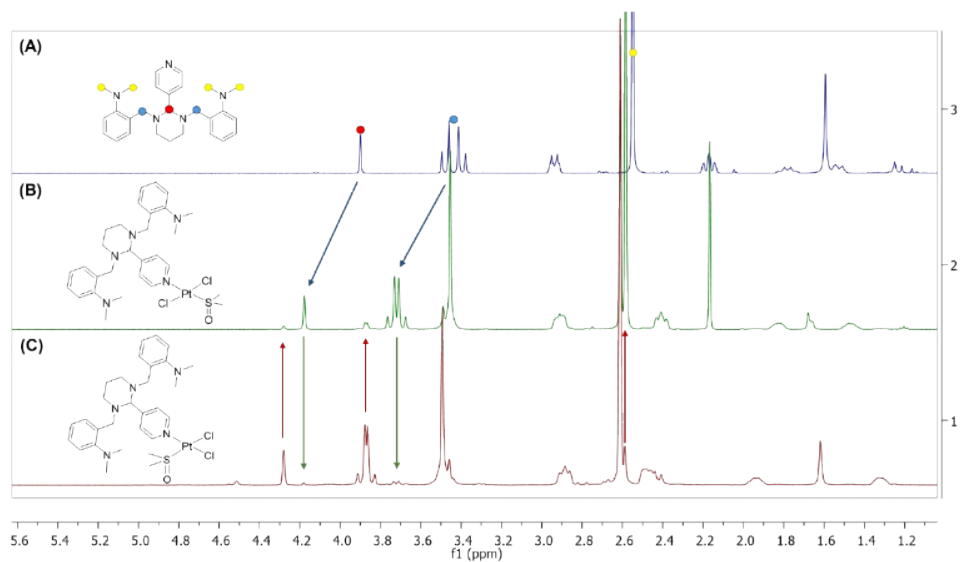

Figure S9.  $^1\text{H}$  NMR ( $\text{CDCl}_3$ ) of the aliphatic region (5.4 – 2.4 ppm) of (A) GANT61, (B) *trans*- $[\text{Pt}(\text{II})\text{Cl}_2(\text{dmsO})(\text{GANT61})]$  22 and (C) *cis*- $[\text{Pt}(\text{II})\text{Cl}_2(\text{dmsO})(\text{GANT61})]$  21, highlighting key chemical shifts associated with *trans* to *cis* isomerisation.

A.

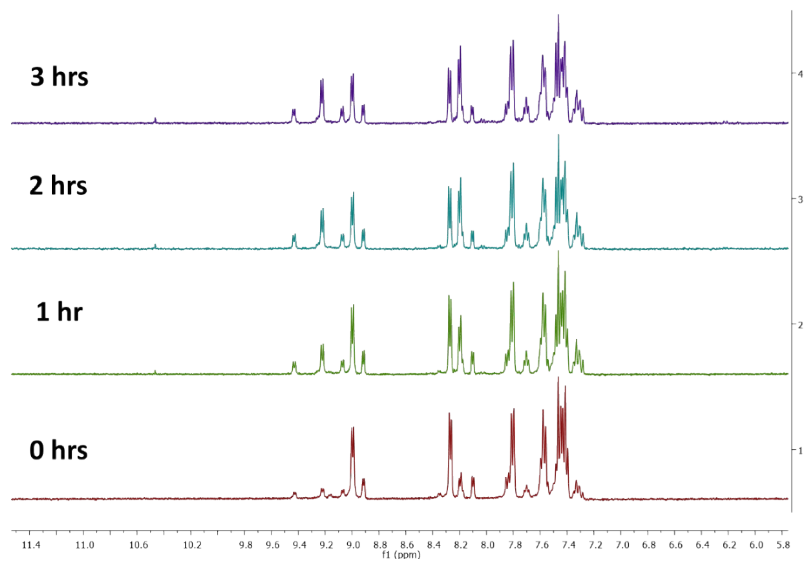

B.

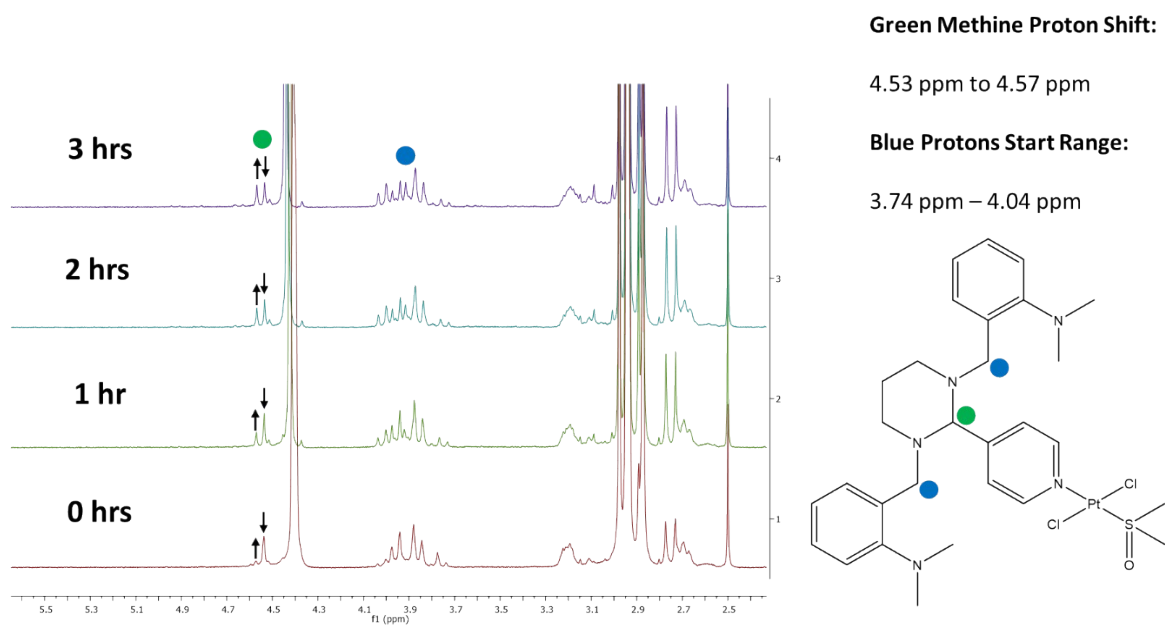

Figure S10.  $^1\text{H}$  NMR study of **2** in  $\text{D}_6\text{-DMSO}:\text{D}_2\text{O}$  (90:10) over 3 hours at RT. A. Aromatic region and B. Aliphatic region of the  $^1\text{H}$  NMR spectrum.



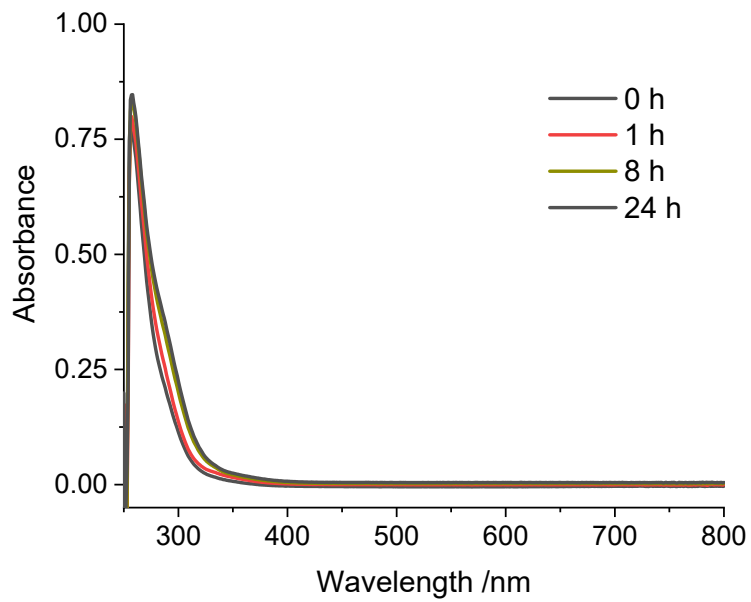

Figure S11. UV-Vis spectrum of **2** (50 μM) in DMSO over the course of 24 h at 37 °C.

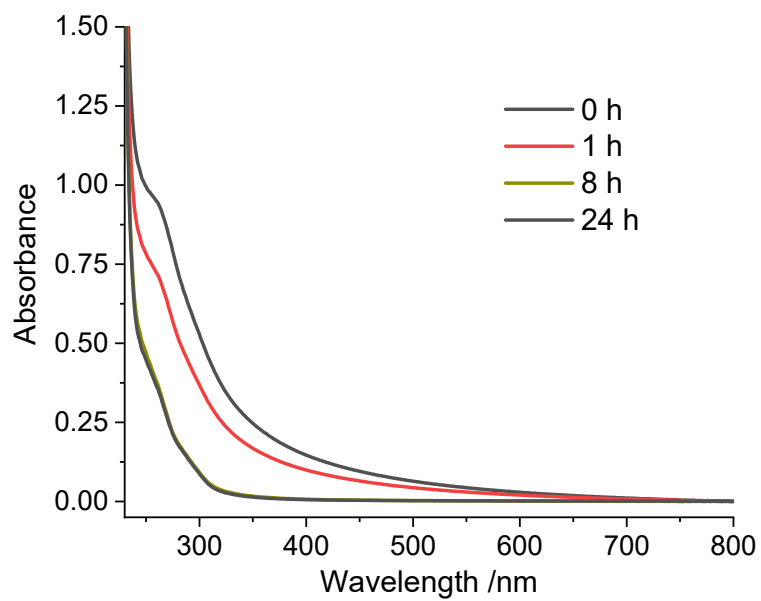

Figure S12. UV-Vis spectrum of **2** (50 μM) in PBS:DMSO (200:1) over the course of 24 h at 37 °C.

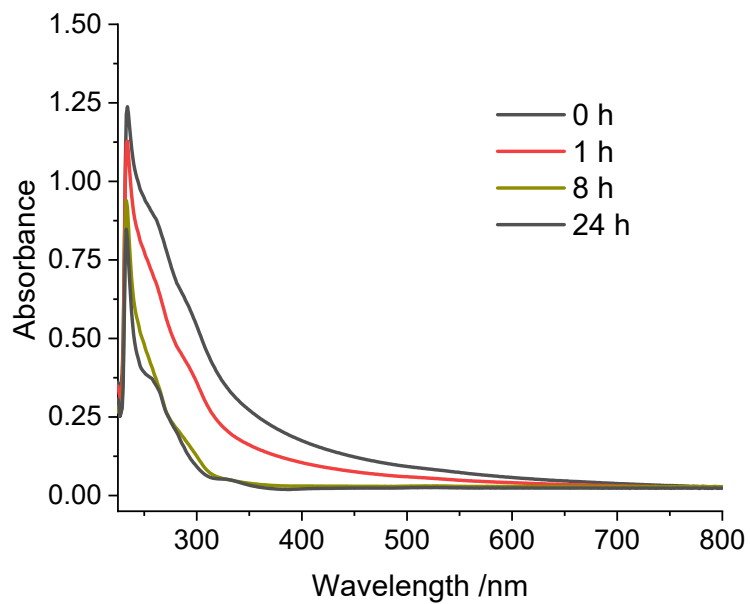

Figure S13. UV-Vis spectrum of 2 (50 μM) in DMEM:DMSO (200:1) over the course of 24 h at 37 °C.

JNS Pt2 72Hr  
G2-4607 39 (0.354)

1: TOF MS ES+  
1.54e6

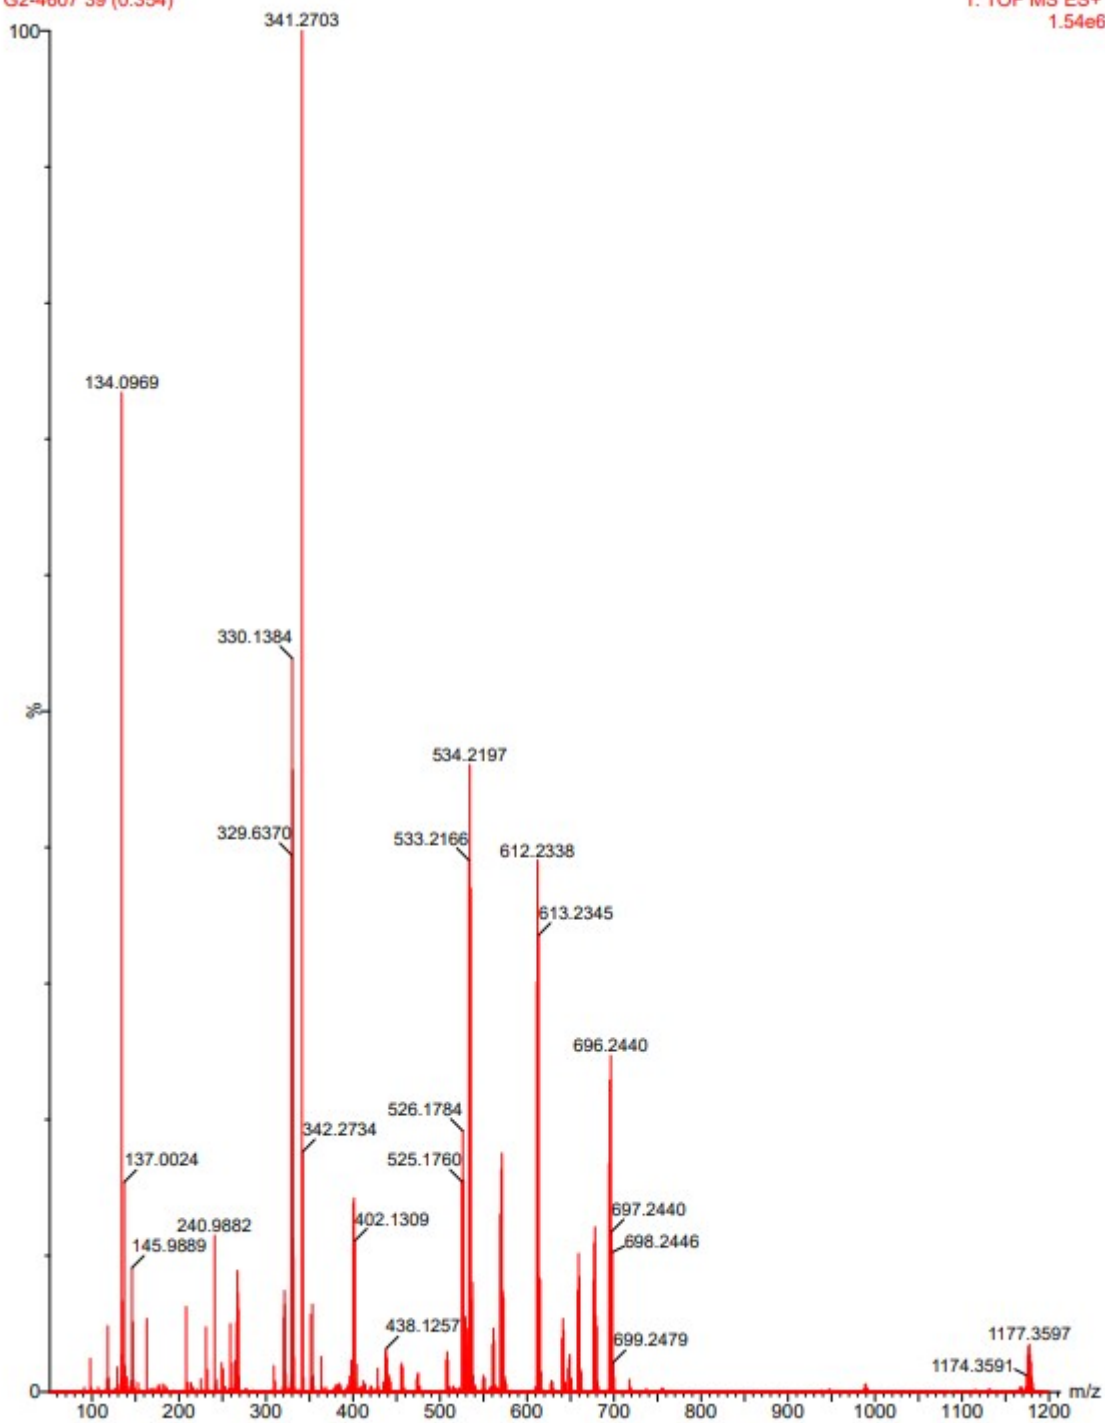

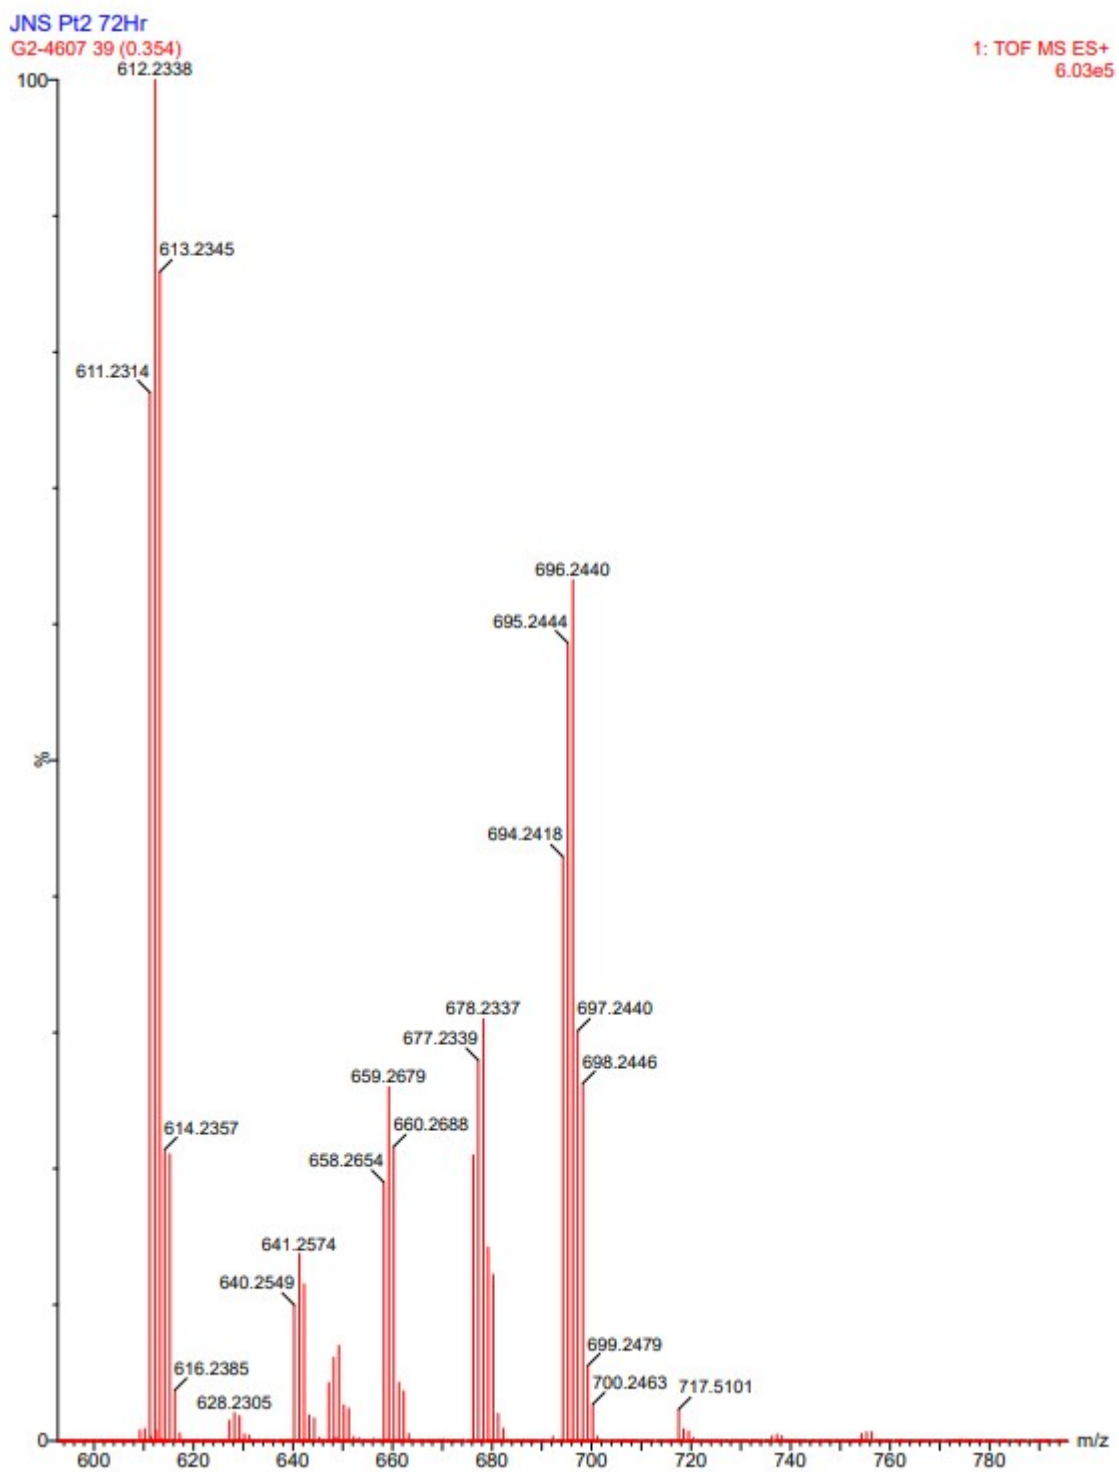

Figure S14. HR MS spectra (top is full spectrum and bottom zoomed in spectrum) of **2** (500  $\mu$ M) in H<sub>2</sub>O:DMSO (10:1) post 72 h incubation at 37  $^{\circ}$ C.

A.

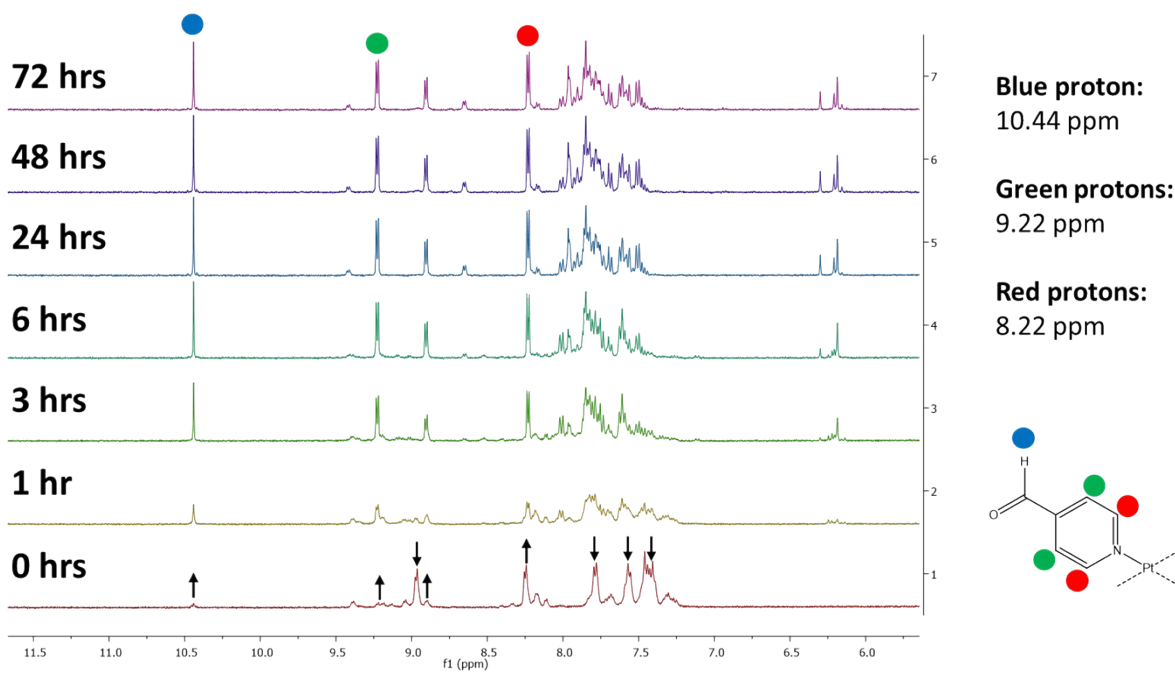

B.

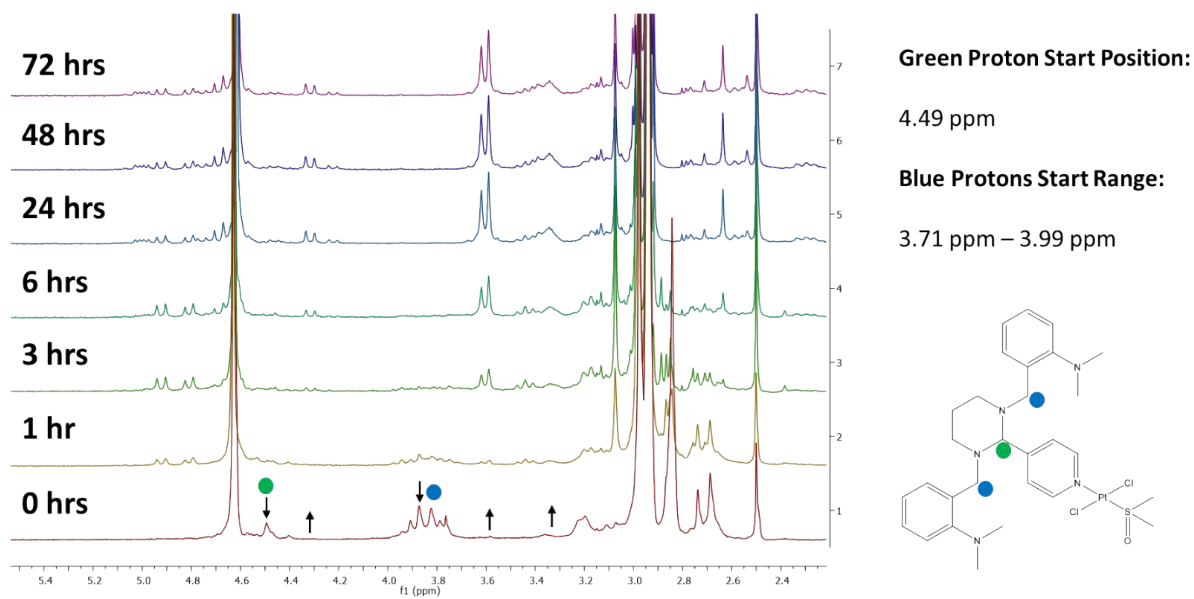

Figure S15.  $^1\text{H}$  NMR study of **2** in  $\text{D}_6\text{-DMSO}:\text{D}_2\text{O}$  (90:10) over 72 hours at  $37^\circ\text{C}$ . A. Aromatic region and B. Aliphatic region of the  $^1\text{H}$  NMR spectrum.

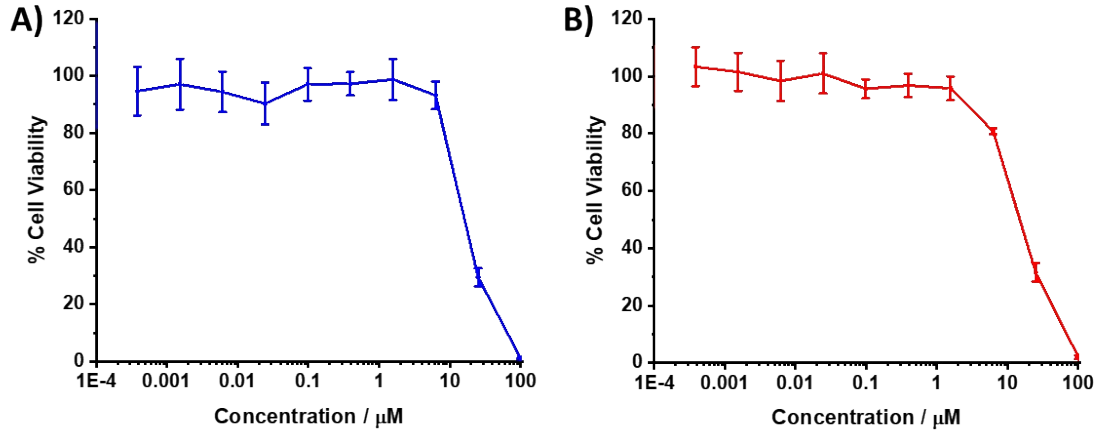

Figure S16. Representative dose-response curves for the treatment of (A) HMLER and (B) HMLER-shEcad cells with GANT61 after 72 h incubation.

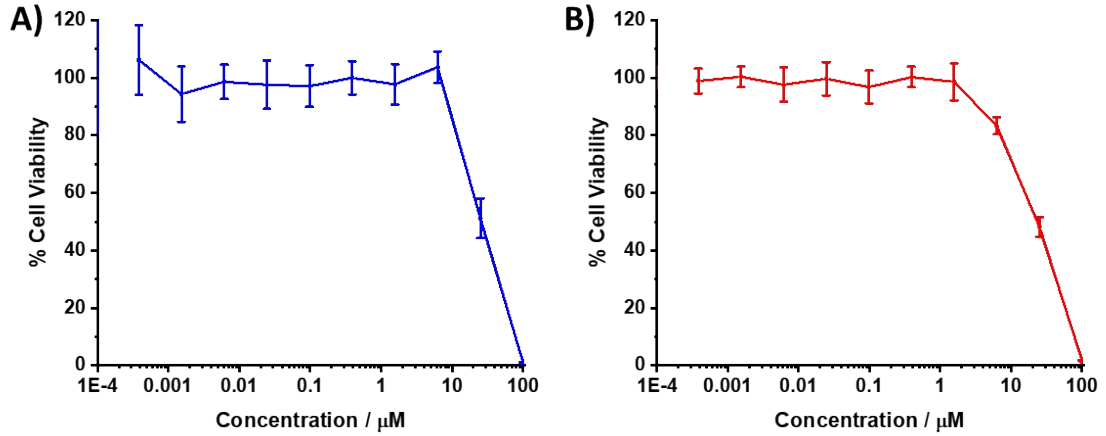

Figure S17. Representative dose-response curves for the treatment of (A) HMLER and (B) HMLER-shEcad cells with GANT61-D after 72 h incubation.

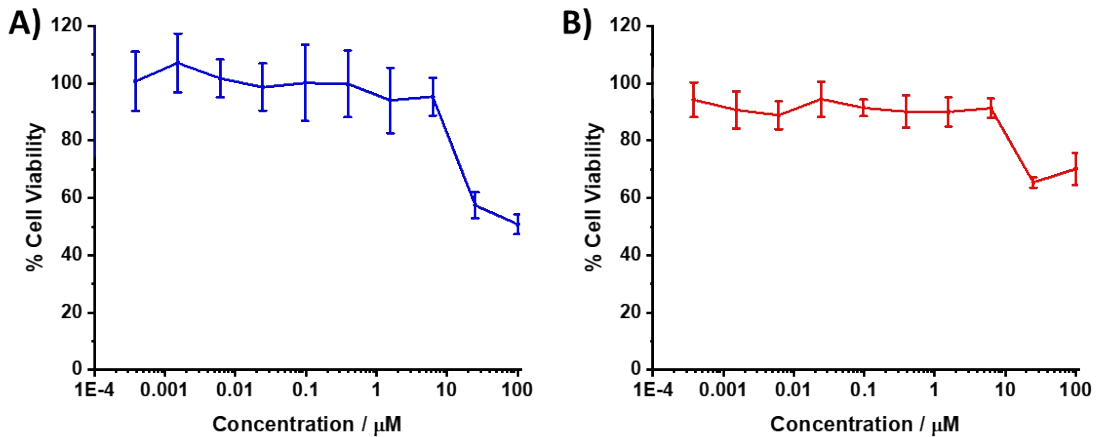

Figure S18. Representative dose-response curves for the treatment of (A) HMLER and (B) HMLER-shEcad cells with 4-PCA after 72 h incubation.

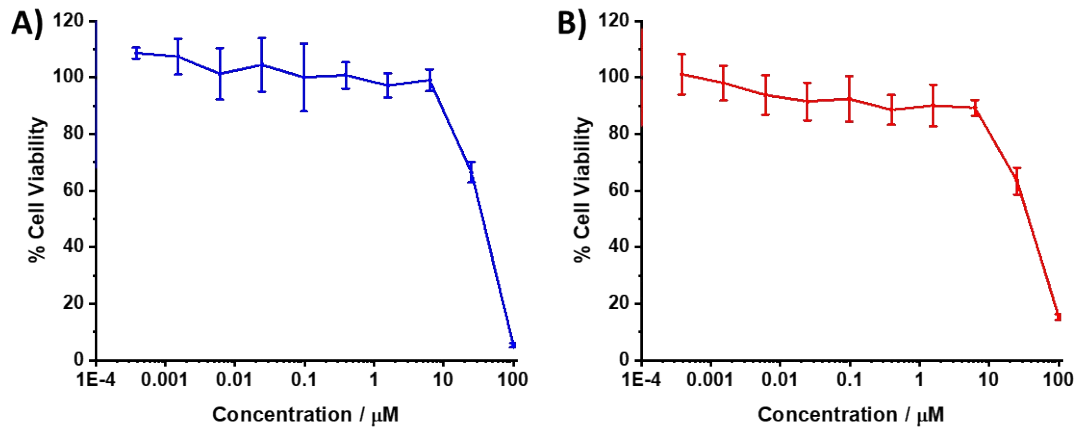

Figure S19. Representative dose-response curves for the treatment of (A) HMLER and (B) HMLER-shEcad cells with **1** after 72 h incubation.

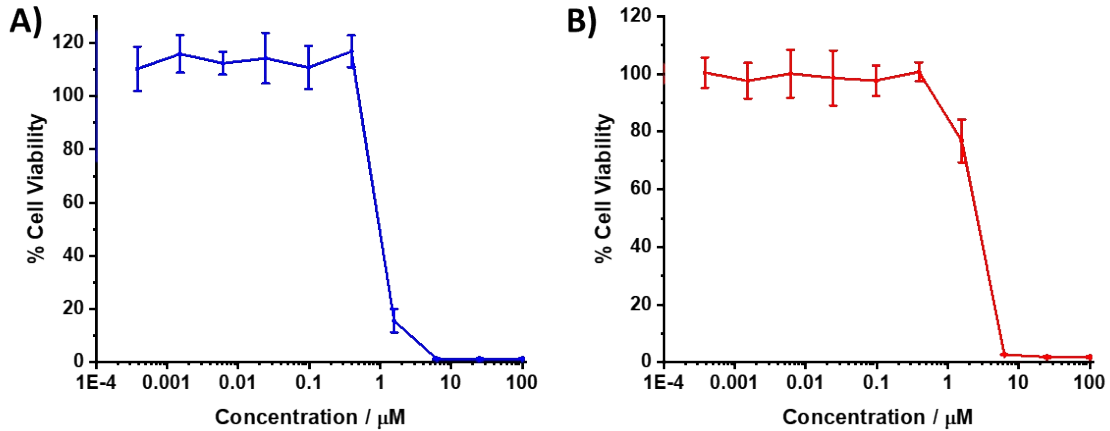

Figure S20. Representative dose-response curves for the treatment of (A) HMLER and (B) HMLER-shEcad cells with **2** after 72 h incubation.

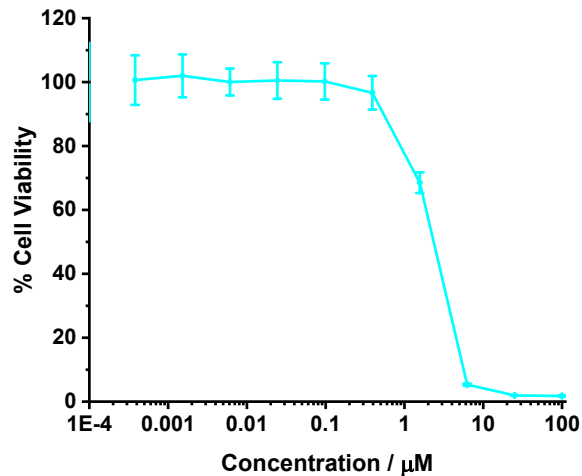

Figure S21. Representative dose-response curves for the treatment of MCF10A cells with **2** after 72 h incubation.

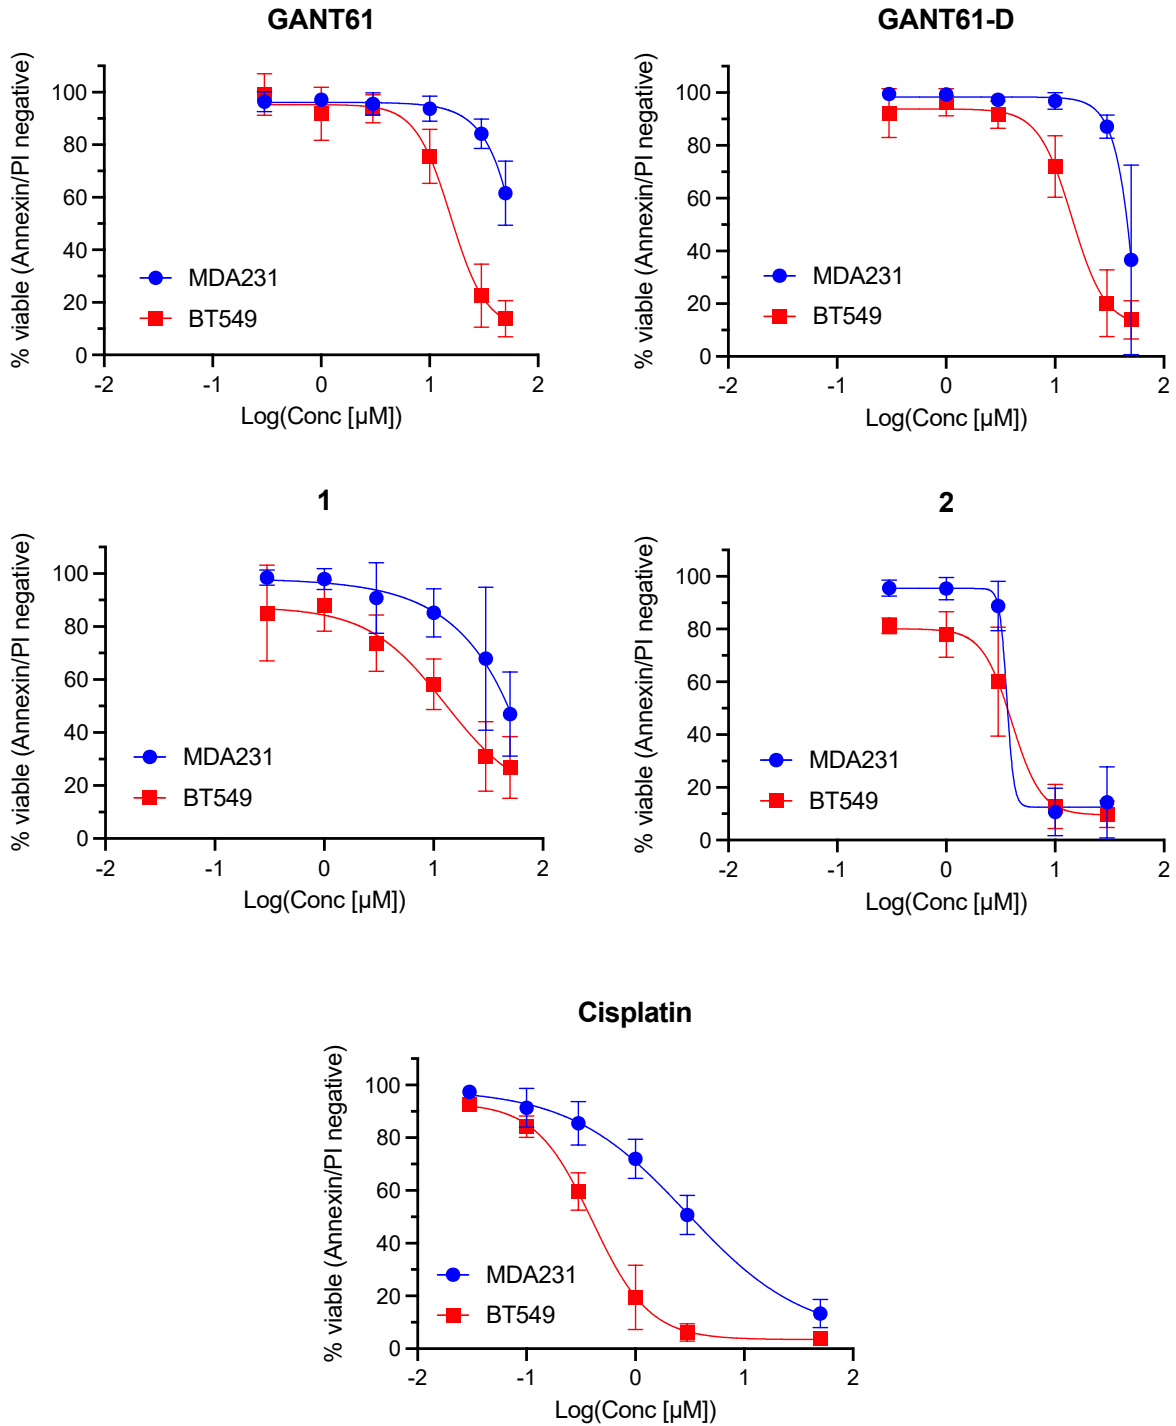

Figure S22. Annexin V-PI cell viability dose-response curves for the treatment of MDA231 (blue) and BT549 (red) cells with GANT61, GANT61-D, **1**, **2**, or cisplatin after 48 h incubation normalized to DMSO control. Data show mean  $\pm$  SD ( $n = 3$ ).
